# Supplementary material
Source: PubMed Central journal article supplement (PMC7493286)
Supplement: cs9b05223_si_001.pdf [file cs9b05223_si_001.pdf]

## Supporting Information

# Robust $\omega$ -Transaminases by Computational Stabilization of the Subunit Interface

Qinglong Meng<sup>1</sup>, Nikolas Capra<sup>1</sup>, Cyntia M. Palacio<sup>1</sup>, Elisa Lanfranchi<sup>1</sup>, Marleen Otzen<sup>1</sup>, Luc Z. van Schie<sup>1</sup>, Henriëtte J. Rozeboom, Andy-Mark W. H. Thunnissen<sup>1</sup>, Hein J. Wijma<sup>1</sup>, Dick B. Janssen<sup>1\*</sup>

<sup>1</sup>Biotransformation and Biocatalysis, Groningen Biomolecular Sciences and Biotechnology Institute (GBB), University of Groningen, Nijenborgh 4, 9747 AG Groningen, The Netherlands

\* Corresponding author  
Groningen Biomolecular Sciences and Biotechnology Institute  
University of Groningen  
Nijenborgh 4  
9747 AG Groningen  
The Netherlands

E-mail: d.b.janssen@rug.nl

**Table S1.** Data collection and refinement values.

|                                                       | <i>PjTA-R4</i>              | <i>PjTA-R6</i>              |
|-------------------------------------------------------|-----------------------------|-----------------------------|
| <b>Data collection</b>                                |                             |                             |
| Beamline                                              | In-house                    | ESRF/ID30A-3                |
| Wavelength (Å)                                        | 1.54179                     | 0.96770                     |
| Space group                                           | P4 <sub>3</sub>             | P4 <sub>3</sub>             |
| Unit cell dimensions a,b,c, (Å)                       | 98.1, 98.1, 119.3           | 98.9, 98.9, 120.3           |
| Resolution (Å) <sup>A</sup>                           | 49.03 – 1.95<br>(1.99-1.95) | 45.74 – 1.85<br>(1.88-1.85) |
| Total observations                                    | 607461 (31957)              | 584793 (29557)              |
| Unique reflections                                    | 82063 (4522)                | 98464 (4860)                |
| $\langle I/\sigma \rangle^A$                          | 16.7 (2.5)                  | 13.0 (1.5)                  |
| CC <sub>(1/2)</sub>                                   | 0.999 (0.743)               | 0.999 (0.569)               |
| Completeness (%) <sup>A</sup>                         | 100.0 (100.0)               | 100.0 (100.0)               |
| R <sub>merge</sub> (%) <sup>A, B</sup>                | 9.0 (70.1)                  | 6.9 (120.8)                 |
| <b>Refinement</b>                                     |                             |                             |
| R <sub>work</sub> /R <sub>free</sub> (%) <sup>B</sup> | 14.0 / 16.9                 | 15.6 / 18.6                 |
| Number of non-H atoms                                 |                             |                             |
| Protein                                               | 6991 (2 chains)             | 6984 (2 chains)             |
| Solvent                                               | 638                         | 534                         |
| Cofactor                                              | 62 (2 PLP)                  | 64 (2 PLP)                  |
| Average B (Å <sup>2</sup> )                           | 18.2                        | 32.0                        |
| RMSD                                                  |                             |                             |
| Bond lengths (Å)                                      | 0.009                       | 0.006                       |
| Bond angles (°)                                       | 1.5                         | 1.4                         |
| Ramachandran plot % favoured, outliers                | 93.06, 1.25                 | 93.7, 1.3                   |
| <b>PDB entry</b>                                      | 6TB0                        | 6TB1                        |

<sup>A</sup> Values in parentheses correspond to highest resolution shell.

<sup>B</sup> R<sub>free</sub> is calculated as R<sub>work</sub> using 5% of all reflections randomly chosen, which were excluded from structure refinement.

**Table S2.** Potentially stabilizing mutations predicted by Rosetta and FoldX energy calculations.

| Mutation | $\Delta\Delta G^{\text{Predicted}}$<br>(kJ/mol/subunit) |                  |                   | $\Delta T_m^{\text{app}}$<br>(°C) <sup>A</sup> | Location      | B-factor<br>rank | Stricter energy<br>criteria passed |
|----------|---------------------------------------------------------|------------------|-------------------|------------------------------------------------|---------------|------------------|------------------------------------|
|          | FoldX                                                   | Rosetta<br>row 3 | Rosetta<br>row 16 |                                                |               |                  |                                    |
| S6K      | 0.4                                                     | -2.7             | -4.6              | 0.5                                            | Surface       | 1                | -                                  |
| P9A      | 9.0                                                     | -4.3             | 3.9               | 2.0                                            | Surface       | 54               | -                                  |
| P9K      | 3.4                                                     | -7.4             | 5.4               | 1.5                                            | Surface       | 54               | -                                  |
| P9R      | 3.1                                                     | -5.0             | 12.1              | 0.5                                            | Surface       | 54               | -                                  |
| I13K     | -3.4                                                    | 4.8              | 13.4              | 0.0                                            | Surface       | 82               | -                                  |
| N22D     | -9.3                                                    | 8.5              | 3.4               | 0.0                                            | Surface       | 88               | -                                  |
| N22E     | -3.8                                                    | 12.9             | 5.4               | -0.5                                           | Surface       | 88               | -                                  |
| A23L     | -9.2                                                    | 0.9              | -16.8             | 0.0                                            | Surface       | 107              | +                                  |
| H26F     | -3.3                                                    | 5.1              | 9.2               | 0.0                                            | Surface       | 84               | -                                  |
| H26M     | -2.6                                                    | 11.6             | 16.1              | 0.0                                            | Surface       | 84               | -                                  |
| E28K     | -2.2                                                    | -8.2             | -8.0              | 0.5                                            | Surface       | 4                | -                                  |
| E35L     | -4.3                                                    | -13.4            | -12.0             | -0.5                                           | Surface       | 39               | +                                  |
| E38K     | 1.2                                                     | -9.9             | -7.5              | 1.5                                            | Surface       | 25               | -                                  |
| E38Q     | 0.3                                                     | -5.5             | -6.4              | 2.0                                            | Surface       | 25               | -                                  |
| E38N     | 1.3                                                     | -3.0             | -0.4              | -0.5                                           | Surface       | 25               | -                                  |
| E38A     | 3.0                                                     | -9.1             | -2.8              | 0.5                                            | Surface       | 25               | -                                  |
| E38H     | 1.6                                                     | -6.6             | 0.2               | 0.0                                            | Surface       | 25               | -                                  |
| E38S     | -0.9                                                    | -10.5            | -3.2              | -0.5                                           | Surface       | 25               | -                                  |
| D45F     | -6.4                                                    | -8.8             | -11.1             | -1.0                                           | Surface       | 44               | +                                  |
| D45I     | -6.1                                                    | -5.7             | -9.0              | 0.5                                            | Surface       | 44               | +                                  |
| D45K     | -4.4                                                    | -1.1             | 6.1               | -1.5                                           | Surface       | 44               | -                                  |
| D45V     | -3.2                                                    | -2.5             | -2.6              | 0.0                                            | Surface       | 44               | -                                  |
| D45W     | -4.5                                                    | -15.9            | -12.8             | -0.5                                           | Surface       | 44               | +                                  |
| D45Y     | -7.1                                                    | -11.5            | -12.0             | -1.5                                           | Surface       | 44               | +                                  |
| Q46K     | -0.2                                                    | -3.0             | 5.0               | 0.5                                            | Surface       | 20               | -                                  |
| Q46N     | 0.1                                                     | -4.3             | 4.4               | -0.5                                           | Surface       | 20               | -                                  |
| G49A     | -0.5                                                    | -4.0             | -5.7              | -2.5                                           | Surface       | 233              | -                                  |
| G49P     | -6.7                                                    | 6.4              | -11.0             | -0.5                                           | Surface       | 233              | +                                  |
| N66D     | -9.5                                                    | 14.6             | 17.2              | No Signal                                      | Surface       | 243              | -                                  |
| E74I     | -7.8                                                    | -11.2            | -15.3             | 5.5                                            | Surf & Interf | 83               | +                                  |
| N78K     | -0.1                                                    | -4.1             | 3.8               | 1.0                                            | Surf & Interf | 164              | -                                  |
| F86W     | 2.9                                                     | -12.9            | -13.3             | 4.0                                            | Interface     | 267              | -                                  |
| S87D     | -3.0                                                    | 1.1              | -3.1              | 7.0                                            | Interface     | 138              | -                                  |
| S87H     | -2.0                                                    | -15.1            | -15.7             | 1.0                                            | Interface     | 138              | -                                  |
| S87N     | -4.1                                                    | -9.9             | -6.8              | 1.5                                            | Interface     | 138              | -                                  |
| S87Q     | -3.8                                                    | -4.8             | 2.8               | 1.0                                            | Interface     | 138              | -                                  |
| K89Q     | 3.4                                                     | -3.7             | -13.3             | 0.5                                            | Interface     | 184              | -                                  |
| K89A     | 1.2                                                     | -4.4             | -7.6              | 2.0                                            | Interface     | 184              | -                                  |
| K89F     | -6.2                                                    | -19.0            | -23.5             | 6.0                                            | Interface     | 184              | +                                  |
| K89L     | -3.7                                                    | 1.1              | -11.1             | 4.5                                            | Interface     | 184              | -                                  |
| K89M     | -6.0                                                    | -5.9             | -13.0             | 3.5                                            | Interface     | 184              | +                                  |
| K89W     | 8.2                                                     | -15.9            | -29.4             | 3.5                                            | Interface     | 184              | -                                  |
| K89Y     | -0.8                                                    | -16.6            | -19.6             | 4.0                                            | Interface     | 184              | -                                  |
| H91F     | 4.8                                                     | -4.1             | -8.6              | -1.0                                           | Surface       | 259              | -                                  |
| S94A     | -2.0                                                    | -9.4             | -12.9             | 8.0                                            | Interface     | 276              | -                                  |
| E99K     | -2.1                                                    | -7.6             | 10.5              | -2.0                                           | Surface       | 118              | -                                  |
| E103A    | 3.1                                                     | -4.1             | 2.8               | -0.5                                           | Surface       | 36               | -                                  |
| E103K    | 0.1                                                     | -6.5             | 5.6               | 0.0                                            | Surface       | 36               | -                                  |

| Mutation | $\Delta\Delta G^{\text{Predicted}}$<br>(kJ/mol/subunit) |                  |                   | $\Delta T_m^{\text{app}}$<br>(°C) <sup>A</sup> | Location  | B-factor<br>rank | Stricter energy<br>criteria passed |
|----------|---------------------------------------------------------|------------------|-------------------|------------------------------------------------|-----------|------------------|------------------------------------|
|          | FoldX                                                   | Rosetta<br>row 3 | Rosetta<br>row 16 |                                                |           |                  |                                    |
| E103S    | 3.6                                                     | -3.5             | 6.1               | No Signal                                      | Surface   | 36               | -                                  |
| M109F    | -0.1                                                    | -9.6             | -19.5             | -1.5                                           | Surface   | 200              | -                                  |
| M109Y    | 7.9                                                     | -6.8             | -0.5              | -1.0                                           | Surface   | 200              | -                                  |
| S110Q    | -3.8                                                    | -4.7             | 2.3               | 1.0                                            | Surface   | 211              | -                                  |
| N116L    | -8.8                                                    | -2.3             | -8.9              | -1.0                                           | Interface | 422              | +                                  |
| G118A    | -4.2                                                    | -6.6             | -5.7              | -1.5                                           | Interface | 454              | -                                  |
| G118E    | -8.6                                                    | 31.1             | 43.2              | -0.5                                           | Interface | 454              | -                                  |
| G118L    | -9.0                                                    | 23.7             | 23.4              | -0.5                                           | Interface | 454              | -                                  |
| G118M    | -10.3                                                   | 7.0              | 11.5              | -1.5                                           | Interface | 454              | -                                  |
| G118P    | -14.2                                                   | -1.4             | -12.1             | -1.5                                           | Interface | 454              | +                                  |
| G118Y    | -9.5                                                    | 24.6             | 24.6              | -4.5                                           | Interface | 454              | -                                  |
| M128F    | -5.0                                                    | -15.5            | -14.8             | 4.5                                            | Interface | 269              | +                                  |
| M128L    | 2.4                                                     | -7.8             | -3.6              | -0.5                                           | Interface | 269              | -                                  |
| M128W    | 9.2                                                     | -10.6            | 5.6               | 0.5                                            | Interface | 269              | -                                  |
| M128Y    | -1.5                                                    | -10.8            | -8.8              | 0.0                                            | Interface | 269              | -                                  |
| Y131F    | -3.1                                                    | 12.2             | 8.0               | -1.5                                           | Surface   | 176              | -                                  |
| N133A    | -2.6                                                    | 0.1              | 1.4               | No Signal                                      | Surface   | 145              | -                                  |
| P139K    | 5.6                                                     | -3.2             | 4.5               | 1.0                                            | Surface   | 94               | -                                  |
| A140K    | -4.1                                                    | -2.2             | -0.8              | 0.0                                            | Surface   | 131              | -                                  |
| A140Q    | -3.1                                                    | -1.1             | 6.3               | No Signal                                      | Surface   | 131              | -                                  |
| N149G    | -3.0                                                    | 1.8              | 2.7               | 2.5                                            | Surface   | 294              | -                                  |
| N149K    | -2.8                                                    | 4.6              | 5.7               | No Signal                                      | Surface   | 294              | -                                  |
| N149R    | -5.3                                                    | 4.1              | 16.5              | 0.5                                            | Surface   | 294              | -                                  |
| G150A    | -5.1                                                    | -10.5            | -3.0              | 0.0                                            | Buried    | 437              | -                                  |
| G150S    | -1.8                                                    | -9.4             | -2.3              | No Signal                                      | Buried    | 437              | -                                  |
| H152F    | -6.8                                                    | 4.2              | -1.6              | -1.0                                           | Buried    | 428              | -                                  |
| H152Y    | -2.7                                                    | 4.5              | 0.9               | -2.0                                           | Buried    | 428              | -                                  |
| I154D    | 12.0                                                    | -3.2             | -0.8              | 4.0                                            | Interface | 322              | -                                  |
| I154N    | 13.3                                                    | -7.0             | -5.7              | 3.5                                            | Interface | 322              | -                                  |
| I154V    | 3.1                                                     | -10.3            | -5.2              | 9.0                                            | Interface | 322              | -                                  |
| G166S    | -0.8                                                    | -6.6             | 1.1               | -0.5                                           | Surface   | 142              | -                                  |
| Q168K    | -8.0                                                    | 9.2              | 14.4              | 0.0                                            | Surface   | 197              | -                                  |
| G182P    | -5.9                                                    | 5.7              | -10.3             | -1.5                                           | Surface   | 280              | +                                  |
| G182S    | -3.6                                                    | -3.4             | -0.3              | -3.0                                           | Surface   | 280              | -                                  |
| C183P    | -5.6                                                    | 3.1              | -0.3              | -7.5                                           | Surface   | 250              | -                                  |
| Y187F    | -3.7                                                    | 1.4              | -4.9              | -1.3                                           | Surface   | 225              | -                                  |
| Y187M    | -3.6                                                    | 15.2             | 14.1              | -1.5                                           | Surface   | 225              | -                                  |
| F189Y    | 1.8                                                     | -2.8             | 3.9               | 0.5                                            | Surface   | 112              | -                                  |
| L191A    | 0.8                                                     | 1.0              | -2.9              | -0.5                                           | Surface   | 8                | -                                  |
| A192P    | -3.7                                                    | -5.6             | -7.0              | 0.5                                            | Surface   | 7                | -                                  |
| E196P    | -3.6                                                    | 7.1              | -0.4              | -0.5                                           | Surface   | 41               | -                                  |
| H198A    | 1.6                                                     | -4.6             | -4.4              | 0.5                                            | Surface   | 11               | -                                  |
| H198Q    | -0.9                                                    | -5.0             | -4.1              | 0.5                                            | Surface   | 11               | -                                  |
| H198R    | -0.9                                                    | -3.8             | 3.8               | 0.0                                            | Surface   | 11               | -                                  |
| D201N    | 0.8                                                     | -4.8             | 0.9               | -0.5                                           | Surface   | 69               | -                                  |
| V205R    | -2.9                                                    | 0.9              | -0.5              | -2.5                                           | Surface   | 80               | -                                  |
| E206Y    | -5.7                                                    | -5.6             | -10.7             | 0.5                                            | Surface   | 98               | +                                  |
| K210L    | -5.0                                                    | -5.0             | -5.1              | -0.5                                           | Surface   | 34               | -                                  |
| T218K    | 1.3                                                     | -2.7             | 1.8               | 0.0                                            | Surface   | 122              | -                                  |
| M228L    | -1.1                                                    | -8.7             | 2.1               | No Signal                                      | Buried    | 238              | -                                  |

| Mutation | $\Delta\Delta G^{\text{Predicted}}$<br>(kJ/mol/subunit) |                  |                   | $\Delta T_m^{\text{app}}$<br>(°C) <sup>A</sup> | Location  | B-factor<br>rank | Stricter energy<br>criteria passed |
|----------|---------------------------------------------------------|------------------|-------------------|------------------------------------------------|-----------|------------------|------------------------------------|
|          | FoldX                                                   | Rosetta<br>row 3 | Rosetta<br>row 16 |                                                |           |                  |                                    |
| V235R    | -3.4                                                    | 10.1             | 13.8              | -0.5                                           | Surface   | 282              | -                                  |
| R238H    | -3.1                                                    | 7.4              | 7.7               | 0.5                                            | Surface   | 30               | -                                  |
| E242A    | 0.1                                                     | -3.8             | -1.4              | 0.5                                            | Surface   | 32               | -                                  |
| E242K    | -0.6                                                    | -4.6             | -4.0              | -0.8                                           | Surface   | 32               | -                                  |
| E242P    | -4.1                                                    | 7.2              | 2.4               | -0.5                                           | Surface   | 32               | -                                  |
| C248L    | -8.8                                                    | -10.4            | -19.6             | -1.0                                           | Surface   | 158              | +                                  |
| C248M    | -2.8                                                    | 0.7              | 9.7               | 0.5                                            | Surface   | 158              | -                                  |
| D252K    | -0.9                                                    | -3.6             | -4.7              | 0.0                                            | Surface   | 46               | -                                  |
| D252N    | -0.6                                                    | -7.7             | -4.3              | No signal                                      | Surface   | 46               | -                                  |
| V255M    | -4.7                                                    | 9.9              | -5.4              | -2.0                                           | Surface   | 220              | -                                  |
| V255L    | -5.8                                                    | 5.3              | -3.2              | -2.0                                           | Surface   | 220              | -                                  |
| D258N    | 5.1                                                     | -8.2             | -11.1             | 0.0                                            | Buried    | 444              | -                                  |
| V260I    | -2.1                                                    | -4.1             | -8.8              | -0.5                                           | Buried    | 448              | -                                  |
| V260L    | -1.3                                                    | -2.7             | -2.5              | -1.0                                           | Buried    | 448              | -                                  |
| C262L    | -6.3                                                    | 6.3              | 11.3              | 0.0                                            | Buried    | 373              | -                                  |
| C262M    | -5.0                                                    | -0.6             | 6.3               | 0.0                                            | Buried    | 373              | -                                  |
| C262P    | -5.9                                                    | 1.3              | -1.5              | 0.0                                            | Buried    | 373              | -                                  |
| G263A    | -0.8                                                    | -6.5             | -8.6              | 0.5                                            | Buried    | 404              | -                                  |
| Q269H    | 0.3                                                     | -5.6             | -2.0              | 0.5                                            | Surface   | 109              | -                                  |
| Q269N    | 0.3                                                     | -4.2             | 0.8               | 0.5                                            | Surface   | 109              | -                                  |
| Q269S    | 2.2                                                     | -4.2             | 1.3               | No signal                                      | Surface   | 109              | -                                  |
| S273A    | -0.9                                                    | -7.0             | -0.9              | 0.0                                            | Surface   | 265              | -                                  |
| Q279K    | -1.4                                                    | -3.8             | -0.4              | -4.0                                           | Surface   | 74               | -                                  |
| Q279N    | 0.5                                                     | -3.6             | -1.2              | -0.5                                           | Surface   | 74               | -                                  |
| Q279H    | -0.5                                                    | -5.9             | 5.3               | No Signal                                      | Surface   | 74               | -                                  |
| M283I    | 1.0                                                     | -3.8             | 4.1               | -3.0                                           | Buried    | 335              | -                                  |
| Q288H    | 19.4                                                    | -6.2             | -10.2             | No signal                                      | Buried    | 389              | -                                  |
| N302D    | -5.6                                                    | 10.4             | 12.0              | 0.5                                            | Surface   | 219              | -                                  |
| A303P    | -4.3                                                    | 4.1              | -2.9              | 0.5                                            | Surface   | 133              | -                                  |
| A303Q    | -2.5                                                    | 1.9              | 1.3               | No signal                                      | Surface   | 133              | -                                  |
| P304A    | 7.5                                                     | -4.8             | -4.4              | -1.0                                           | Surface   | 106              | -                                  |
| V305F    | -3.0                                                    | 13.1             | 1.6               | -0.5                                           | Surface   | 189              | -                                  |
| V305M    | -4.8                                                    | 12.9             | 7.0               | 0.0                                            | Surface   | 189              | -                                  |
| E307H    | 2.9                                                     | -3.6             | -10.5             | 0.0                                            | Surface   | 75               | -                                  |
| E307Q    | 0.5                                                     | -5.3             | -3.7              | 0.0                                            | Surface   | 75               | -                                  |
| D311N    | -1.3                                                    | -4.4             | -2.1              | -0.5                                           | Surface   | 18               | -                                  |
| D311Q    | 0.6                                                     | -3.9             | 4.0               | No signal                                      | Surface   | 18               | -                                  |
| Q312K    | -3.3                                                    | 2.5              | 8.3               | 0.5                                            | Surface   | 22               | -                                  |
| Q314K    | -1.5                                                    | -3.9             | 0.6               | 0.0                                            | Surface   | 15               | -                                  |
| L319F    | -6.9                                                    | -4.9             | -12.9             | 4.0                                            | Interface | 117              | +                                  |
| L319Y    | -2.9                                                    | -5.9             | -13.0             | -0.5                                           | Interface | 117              | -                                  |
| T324L    | -2.8                                                    | 9.5              | 6.8               | -1.5                                           | Interface | 256              | -                                  |
| G325W    | 9.6                                                     | -2.8             | -4.3              | -3.5                                           | Interface | 320              | -                                  |
| G325Y    | 7.8                                                     | -5.1             | -15.6             | -1.0                                           | Interface | 320              | -                                  |
| A333Q    | -2.3                                                    | -2.8             | -3.9              | -0.5                                           | Surface   | 330              | -                                  |
| A333H    | -3.0                                                    | 2.9              | -1.4              | -0.5                                           | Surface   | 330              | -                                  |
| E345A    | 0.3                                                     | -4.8             | -3.5              | -2.5                                           | Surface   | 66               | -                                  |
| E345K    | -4.5                                                    | -9.6             | -6.4              | -3.0                                           | Surface   | 66               | -                                  |
| E345M    | -5.8                                                    | -7.2             | -8.8              | -2.0                                           | Surface   | 66               | +                                  |
| E345N    | -1.6                                                    | -5.5             | -7.1              | -3.0                                           | Surface   | 66               | -                                  |

| Mutation | $\Delta\Delta G^{\text{Predicted}}$<br>(kJ/mol/subunit) |                  |                   | $\Delta T_m^{\text{app}}$<br>(°C) <sup>A</sup> | Location | B-factor<br>rank | Stricter energy<br>criteria passed |
|----------|---------------------------------------------------------|------------------|-------------------|------------------------------------------------|----------|------------------|------------------------------------|
|          | FoldX                                                   | Rosetta<br>row 3 | Rosetta<br>row 16 |                                                |          |                  |                                    |
| S346G    | -3.8                                                    | 0.2              | -1.6              | No signal                                      | Surface  | 121              | -                                  |
| S346K    | -7.3                                                    | -8.1             | -7.6              | 0.0                                            | Surface  | 121              | -                                  |
| S346R    | -3.3                                                    | -3.1             | 1.8               | -0.5                                           | Surface  | 121              | -                                  |
| V348I    | -3.3                                                    | 8.7              | 7.0               | -1.0                                           | Surface  | 203              | -                                  |
| H350W    | -5.2                                                    | -10.7            | -10.1             | 0.5                                            | Surface  | 190              | +                                  |
| Q353K    | -0.1                                                    | -3.6             | 1.4               | 0.8                                            | Surface  | 119              | -                                  |
| R359I    | -5.8                                                    | -4.8             | -13.0             | -0.3                                           | Surface  | 47               | +                                  |
| R359L    | -7.9                                                    | -10.8            | -14.4             | 0.3                                            | Surface  | 47               | +                                  |
| S360A    | -1.1                                                    | -4.7             | -9.8              | -0.8                                           | Surface  | 104              | -                                  |
| S360K    | -2.6                                                    | -6.0             | -3.7              | -0.8                                           | Surface  | 104              | -                                  |
| Q363K    | -3.3                                                    | -4.0             | -2.4              | -0.5                                           | Surface  | 93               | -                                  |
| D367K    | -0.5                                                    | -4.7             | -0.5              | 0.5                                            | Surface  | 155              | -                                  |
| D367N    | 0.6                                                     | -5.6             | -11.3             | 0.5                                            | Surface  | 155              | -                                  |
| D367T    | 1.9                                                     | -4.7             | -6.5              | No signal                                      | Surface  | 155              | -                                  |
| D388N    | 5.2                                                     | -6.2             | -2.5              | 0.0                                            | Surface  | 115              | -                                  |
| V390Q    | -3.0                                                    | 5.7              | 12.3              | 0.0                                            | Surface  | 99               | -                                  |
| V390P    | -3.4                                                    | 30.5             | 2.9               | No signal                                      | Surface  | 99               | -                                  |
| S391K    | 1.8                                                     | -3.5             | -5.4              | -0.5                                           | Surface  | 151              | -                                  |
| K392G    | -2.9                                                    | -2.3             | -0.3              | 0.0                                            | Surface  | 185              | -                                  |
| A393R    | -3.9                                                    | 4.6              | 7.1               | 1.5                                            | Surface  | 201              | -                                  |
| Q396K    | -4.6                                                    | -13.1            | -2.9              | -0.5                                           | Surface  | 174              | -                                  |
| Q396E    | -0.4                                                    | -3.1             | 2.6               | -0.5                                           | Surface  | 174              | -                                  |
| Q396G    | -0.7                                                    | -16.8            | -6.6              | -0.5                                           | Surface  | 174              | -                                  |
| Q396R    | -4.9                                                    | -12.8            | 3.9               | No signal                                      | Surface  | 174              | -                                  |
| Q396S    | -1.3                                                    | -4.6             | 0.7               | -0.5                                           | Surface  | 174              | -                                  |
| A397R    | -2.7                                                    | 4.0              | 8.3               | 0.0                                            | Surface  | 182              | -                                  |
| L398P    | -3.5                                                    | -3.8             | -5.5              | -0.5                                           | Surface  | 135              | -                                  |
| L398Y    | -3.2                                                    | 1.9              | -3.2              | -1.5                                           | Surface  | 135              | -                                  |
| T400F    | -2.8                                                    | 15.5             | 2.6               | No signal                                      | Surface  | 321              | -                                  |
| R403A    | -0.1                                                    | -2.8             | -8.5              | 0.5                                            | Surface  | 140              | -                                  |
| M405F    | 6.3                                                     | -13.1            | -10.0             | -0.5                                           | Buried   | 287              | -                                  |
| M405H    | 11.3                                                    | -6.8             | -9.6              | 0.0                                            | Buried   | 287              | -                                  |
| M405L    | 1.9                                                     | -4.0             | -4.5              | -0.5                                           | Buried   | 287              | -                                  |
| M405W    | 23.8                                                    | -11.9            | -0.8              | No signal                                      | Buried   | 287              | -                                  |
| G407A    | -3.9                                                    | -9.4             | -6.1              | 0.0                                            | Surface  | 383              | -                                  |
| G407F    | -4.5                                                    | -6.8             | -9.0              | 0.0                                            | Surface  | 383              | +                                  |
| G407I    | -5.0                                                    | -12.4            | -9.7              | 0.0                                            | Surface  | 383              | +                                  |
| G407N    | -3.6                                                    | -7.6             | -4.0              | -0.3                                           | Surface  | 383              | -                                  |
| G407S    | -3.6                                                    | -4.2             | 3.6               | No signal                                      | Surface  | 383              | -                                  |
| G407Y    | -4.5                                                    | -8.3             | -13.2             | 0.0                                            | Surface  | 383              | +                                  |
| A409M    | -4.1                                                    | 0.6              | 3.4               | -1.5                                           | Surface  | 408              | -                                  |
| Q410H    | -2.6                                                    | 0.6              | 0.5               | 0.5                                            | Surface  | 240              | -                                  |
| E411K    | -0.6                                                    | -2.7             | 2.5               | 0.0                                            | Surface  | 86               | -                                  |
| E411Q    | -1.1                                                    | -4.9             | 2.4               | 0.0                                            | Surface  | 86               | -                                  |
| A418P    | -4.5                                                    | 7.2              | -2.5              | 0.5                                            | Surface  | 299              | -                                  |
| M419F    | 14.3                                                    | -3.1             | -2.7              | 0.5                                            | Surface  | 206              | -                                  |
| M419I    | 3.5                                                     | -6.2             | -1.7              | 1.0                                            | Surface  | 206              | -                                  |
| M419L    | 2.3                                                     | -4.2             | 5.3               | 1.5                                            | Surface  | 206              | -                                  |
| V423I    | -3.0                                                    | 3.4              | 2.7               | No signal                                      | Buried   | 365              | -                                  |
| V423L    | -3.3                                                    | 8.9              | 10.7              | -0.5                                           | Buried   | 365              | -                                  |

| Mutation | $\Delta\Delta G^{\text{Predicted}}$<br>(kJ/mol/subunit) |                  |                   | $\Delta T_m^{\text{app}}$<br>(°C) <sup>A</sup> | Location | B-factor<br>rank | Stricter energy<br>criteria passed |
|----------|---------------------------------------------------------|------------------|-------------------|------------------------------------------------|----------|------------------|------------------------------------|
|          | FoldX                                                   | Rosetta<br>row 3 | Rosetta<br>row 16 |                                                |          |                  |                                    |
| N432D    | -7.3                                                    | 10.7             | 12.9              | 0.0                                            | Surface  | 251              | -                                  |
| E433A    | 5.0                                                     | -9.4             | -1.9              | 0.0                                            | Surface  | 70               | -                                  |
| E433K    | 2.5                                                     | -8.7             | -6.5              | 0.5                                            | Surface  | 70               | -                                  |
| E433P    | -1.5                                                    | -4.5             | -5.7              | 0.5                                            | Surface  | 70               | -                                  |
| E433Q    | 2.2                                                     | -3.2             | -1.9              | 0.0                                            | Surface  | 70               | -                                  |
| G437A    | -3.6                                                    | -8.4             | -1.1              | 0.0                                            | Surface  | 306              | -                                  |
| G437K    | -5.1                                                    | -12.2            | -5.3              | 0.0                                            | Surface  | 306              | -                                  |
| G437N    | -0.8                                                    | -5.9             | -3.2              | -1.0                                           | Surface  | 306              | -                                  |
| G437Y    | -9.4                                                    | -11.1            | -16.1             | 0.5                                            | Surface  | 306              | +                                  |
| R442K    | -5.9                                                    | 0.2              | 1.2               | 0.0                                            | Surface  | 307              | -                                  |
| D448W    | -6.5                                                    | -16.5            | -12.6             | -2.0                                           | Surface  | 148              | +                                  |
| D448R    | -5.0                                                    | -10.0            | -5.6              | -0.5                                           | Surface  | 148              | -                                  |
| D448A    | -2.5                                                    | -9.5             | -10.5             | -1.0                                           | Surface  | 148              | -                                  |
| D448H    | -2.5                                                    | -6.2             | -6.2              | -1.5                                           | Surface  | 148              | -                                  |
| D448K    | -4.6                                                    | -11.4            | -5.7              | -1.0                                           | Surface  | 148              | -                                  |
| D448N    | -2.0                                                    | -6.3             | -5.9              | -1.0                                           | Surface  | 148              | -                                  |
| D448Q    | -3.2                                                    | -8.1             | -8.8              | -1.0                                           | Surface  | 148              | -                                  |
| D448S    | -0.2                                                    | -3.9             | 1.0               | -1.0                                           | Surface  | 148              | -                                  |
| T450L    | -11.3                                                   | -4.7             | -14.6             | -1.5                                           | Surface  | 325              | +                                  |
| T450V    | -6.3                                                    | -5.0             | -6.6              | 0.0                                            | Surface  | 325              | -                                  |
| T451F    | -3.2                                                    | -3.9             | -5.5              | -0.5                                           | Surface  | 217              | -                                  |
| T451K    | -4.7                                                    | -3.6             | -5.2              | 0.0                                            | Surface  | 217              | -                                  |
| T451Q    | -2.7                                                    | -1.7             | -4.9              | 0.0                                            | Surface  | 217              | -                                  |
| T451R    | -3.9                                                    | -3.2             | -1.6              | No signal                                      | Surface  | 217              | -                                  |
| T451W    | -4.9                                                    | -9.5             | -12.8             | 0.0                                            | Surface  | 217              | +                                  |
| Q452K    | -0.7                                                    | -4.0             | 1.7               | 0.0                                            | Surface  | 43               | -                                  |
| Q452A    | 1.2                                                     | -2.8             | 1.8               | 0.0                                            | Surface  | 43               | -                                  |
| V454L    | -2.8                                                    | 20.3             | 18.5              | -0.5                                           | Surface  | 116              | -                                  |

<sup>A</sup>  $T_m^{\text{app}}$  of wild-type *PjTA* (WT) is 62 °C.

**Table S3.** Success rates amongst point mutations in FRESCO libraries.

| Enzyme                           | Number of mutations <sup>A</sup> |                 | Fraction       | Reference                     |
|----------------------------------|----------------------------------|-----------------|----------------|-------------------------------|
|                                  | Tested                           | Stabilizing     | successful (%) |                               |
| Haloalkane dehalogenase LinB     | 109                              | 11              | 10             | Floor et al. <sup>1</sup>     |
| Halohydrin dehalogenase HheC     | 218                              | 29              | 13             | Arabnejad et al. <sup>2</sup> |
| HMF oxidase                      | 140                              | 17              | 12             | Martin et al. <sup>3</sup>    |
| Limonene epoxide hydrolase       | 64                               | 11              | 17             | Wijma et al. <sup>4</sup>     |
| Peptide amidase                  | 120 <sup>B</sup>                 | 12 <sup>B</sup> | 10             | Wu et al. <sup>(5)</sup>      |
| Xylanase                         | 105                              | 10              | 10             | Bu et al. <sup>(6)</sup>      |
| Cyclohexanone monooxygenase      | 128                              | 16              | 13             | Fürst et al. <sup>(7)</sup>   |
| Transaminase (global)            | 236 <sup>B</sup>                 | 32 <sup>B</sup> | 13             | This study                    |
| Transaminase (subunit interface) | 34                               | 19              | 56             | This study                    |

<sup>A</sup> Number of mutations examined in wild-type template.

<sup>B</sup> Includes mutations suggested by consensus analysis.



**Table S4.** Effect of protein structure on the predictions by Rosetta and FoldX energy calculations.

| X-ray structure | $\Delta\Delta G^{\text{Predicted}}$ (kJ/mol/subunit)<br>by FoldX |      |                   | $\Delta\Delta G^{\text{Predicted}}$ (kJ/mol/subunit)<br>by Rosetta Row3 |                   |       |
|-----------------|------------------------------------------------------------------|------|-------------------|-------------------------------------------------------------------------|-------------------|-------|
|                 | 6G4B                                                             | 6G4C | 6G4D              | 6G4B                                                                    | 6G4C              | 6G4D  |
| P9A             | 8.9                                                              | 9.2  | 8.8               | -5.6                                                                    | -1.8 <sup>A</sup> | -5.6  |
| P9K             | 2.7                                                              | 3.0  | 4.5               | -8.8                                                                    | -5.1              | -8.3  |
| E38K            | 0.7                                                              | 1.7  | 1.3               | -10.3                                                                   | -10.7             | -8.8  |
| E38Q            | -0.2                                                             | 0.5  | 0.5               | -5.9                                                                    | -5.7              | -5.0  |
| A60V            | 10.3                                                             | 8.8  | 7.4               | 7.8                                                                     | 6.3               | 5.9   |
| E74I            | -6.8                                                             | -8.8 | -7.7              | -11.4                                                                   | -11.3             | -11.0 |
| N78K            | 0.2                                                              | -0.7 | 0.3               | -4.2                                                                    | -3.7              | -4.4  |
| F86W            | 2.7                                                              | 2.9  | 3.2               | -12.7                                                                   | -12.9             | -13.1 |
| S87D            | -3.0                                                             | -2.7 | -3.2              | 1.1                                                                     | 1.4               | 0.8   |
| S87H            | -2.0                                                             | -2.1 | -2.0              | -14.8                                                                   | -14.9             | -15.5 |
| S87N            | -3.9                                                             | -3.9 | -4.4              | -10.0                                                                   | -9.4              | -10.1 |
| S87Q            | -3.6                                                             | -4.0 | -3.9              | -4.9                                                                    | -5.6              | -3.8  |
| K89A            | 0.7                                                              | 1.7  | 1.1               | -4.5                                                                    | -4.4              | -4.2  |
| K89F            | -6.9                                                             | -5.3 | -6.3              | -18.9                                                                   | -18.3             | -19.7 |
| K89L            | -3.7                                                             | -3.7 | -3.7              | 1.6                                                                     | 2.5               | -0.7  |
| K89M            | -6.5                                                             | -5.9 | -5.5              | -5.9                                                                    | -5.9              | -5.8  |
| K89W            | 6.7                                                              | 9.1  | 8.7               | -16.3                                                                   | -15.0             | -16.5 |
| K89Y            | 0.2                                                              | 1.0  | -3.5 <sup>B</sup> | -16.3                                                                   | -15.6             | -17.8 |
| S94A            | -2.2                                                             | -1.7 | -2.0              | -9.5                                                                    | -9.3              | -9.3  |
| S110Q           | -3.1                                                             | -4.6 | -3.6              | -4.1                                                                    | -5.3              | -4.8  |
| M128F           | -4.9                                                             | -5.3 | -4.7              | -15.7                                                                   | -15.0             | -15.9 |
| P139K           | 4.2                                                              | 6.0  | 6.5               | -2.9                                                                    | -2.4 <sup>A</sup> | -4.3  |
| N149G           | -1.7                                                             | -2.7 | -4.7              | 1.7                                                                     | 1.0               | 2.6   |
| I154D           | 11.3                                                             | 13.8 | 10.8              | -1.9 <sup>A</sup>                                                       | -3.0              | -4.7  |
| I154N           | 12.1                                                             | 14.6 | 13.2              | -6.1                                                                    | -7.0              | -8.0  |
| I154V           | 3.2                                                              | 4.1  | 1.9               | -8.7                                                                    | -10.3             | -12.0 |
| L227V           | 12.6                                                             | 14.2 | 14.6              | 10.0                                                                    | 11.1              | 10.1  |
| L319F           | -6.8                                                             | -6.8 | -7.0              | -4.8                                                                    | -5.6              | -4.3  |
| A393R           | -3.7                                                             | -4.3 | -3.8              | 4.6                                                                     | 4.9               | 4.4   |
| M419I           | 3.4                                                              | 4.3  | 2.9               | -4.7                                                                    | -5.7              | -8.1  |
| M419L           | 2.5                                                              | 1.1  | 3.3               | -3.0                                                                    | -4.2              | -5.3  |

<sup>A</sup> With this value for  $\Delta\Delta G^{\text{Predicted}}$ , the mutation would have fallen outside the -2.5 kJ/mol/subunit criterion and would not have been selected for experimental characterization.

<sup>B</sup> With this value for  $\Delta\Delta G^{\text{Predicted}}$  the mutation would have fallen inside the criterion for FoldX, unlike with the averaging over three structures. However, this mutation was selected by Rosetta with all three X-ray structures. Thus, this would not have influenced the outcome of the selection procedure.

**Table S5.** Potentially stabilizing mutations selected by phylogenetic analysis and subjected to experimental verification.

| Mutation | Location  | $\Delta T_m^{\text{app}}$ ( $^{\circ}\text{C}$ ) <sup>A</sup> |
|----------|-----------|---------------------------------------------------------------|
| A60V     | Interface | 4                                                             |
| F77M     | Interface | -0.5                                                          |
| I154V    | Interface | 9                                                             |
| L227V    | Surface   | 1                                                             |
| C248L    | Surface   | 0.5                                                           |
| I256V    | Buried    | 0.5                                                           |
| S290T    | Interface | -1                                                            |
| A297S    | Buried    | -6                                                            |
| A303D    | Surface   | No signal                                                     |
| N432T    | Surface   | 0                                                             |

<sup>A</sup>  $T_m^{\text{app}}$  of WT is 62  $^{\circ}\text{C}$ .

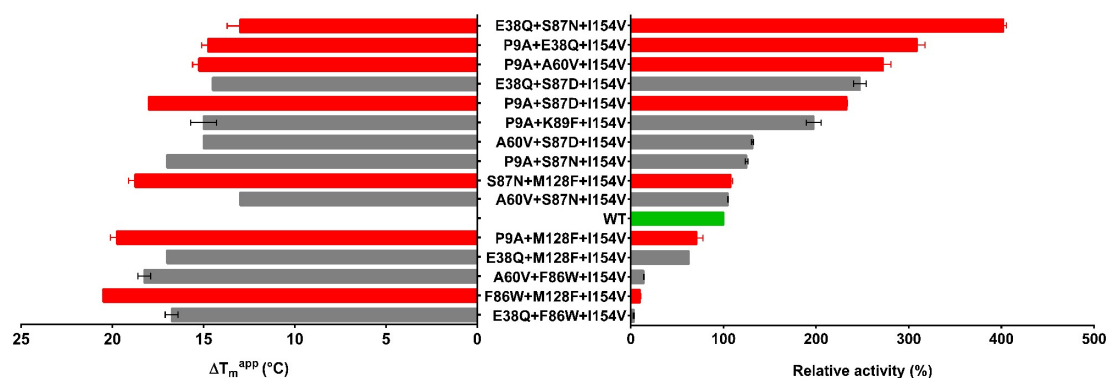

**Figure S1.** Activities and  $\Delta T_m^{\text{app}}$  of *Pj*TA triple mutants. Activities were determined by measuring acetophenone formation from (*S*)-1-PEA as described in Materials and Methods (WT: 13 U/mg, 1 U equals 1  $\mu\text{mol}$  product former per min). WT is marked with a green bar. Triple mutants shown with red bars were selected as templates for construction of four-fold mutants.

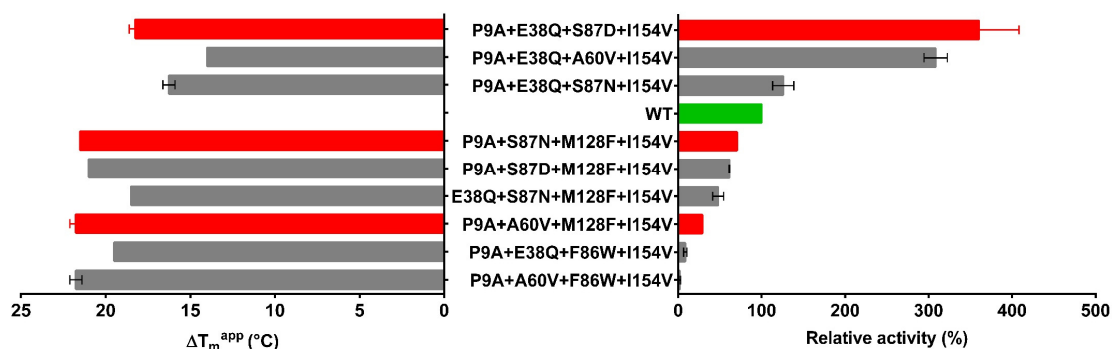

**Figure S2.** Activities and  $\Delta T_m^{\text{app}}$  of *PjTA* four-fold mutants. Activities were determined by measuring acetophenone formation from (*S*)-1-PEA as described under Materials and Methods. Wild-type *PjTA* (WT) is shown as a green bar. Four-fold mutants shown with red bars were selected as templates to construct five-fold mutants.

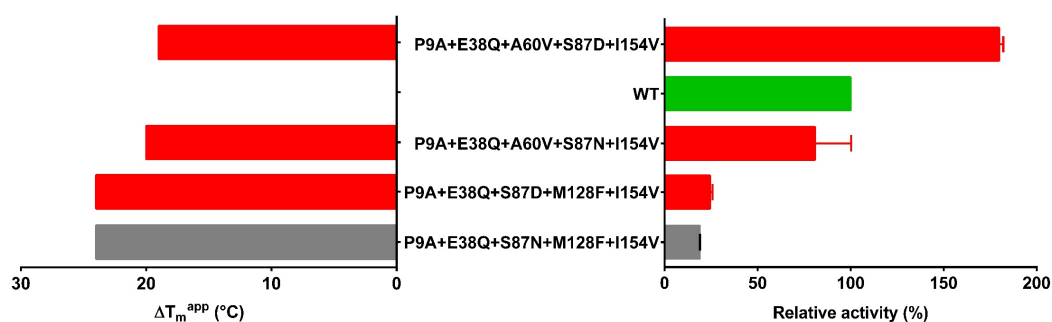

**Figure S3.** Activities and  $\Delta T_m^{\text{app}}$  of *PjTA* five-fold mutants. Activities were determined by measuring acetophenone formation from (*S*)-1-PEA as described under Materials and Methods. WT is marked as green bar. Five-fold mutants with red color were selected as templates for six-fold mutants.

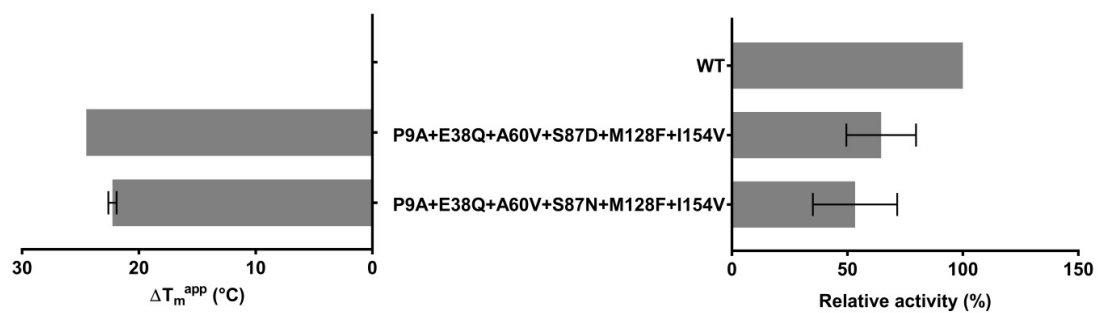

**Figure S4.** Activities and  $\Delta T_m^{\text{app}}$  of *PjTA* six-fold mutants. Activities were determined by measuring acetophenone formation from (*S*)-1-PEA as described under Materials and Methods.

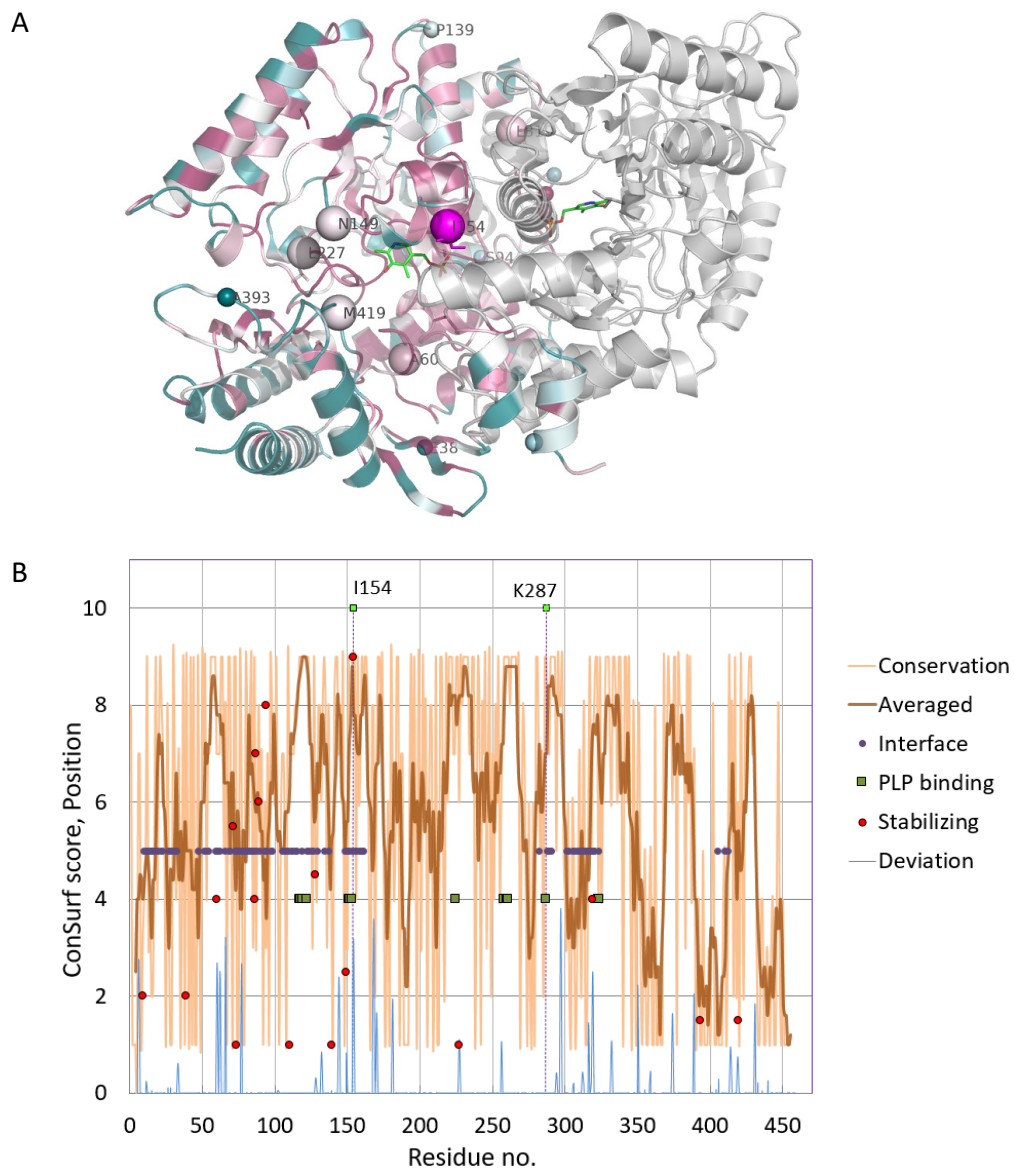

**Figure S5.** Mapping sequence conservation and stabilizing mutations. A set of 1000 fold-type I PLP sequences homologous to *PjTA* (NCBI non-redundant protein sequence database) was aligned (Clustal omega), duplicates were removed by JalView8 (90% identity cutoff),<sup>(8)</sup> and the remaining sequences were analyzed by ConSurf.<sup>(9)</sup> **A**) *PjTA* structure (pdb 6G4B) with the A chain colored turquoise to maroon by ConSurf score. PLP groups are shown as green sticks, Ile154 is colored magenta.  $\text{C}\alpha$  atoms of stabilizing mutated residues are marked with spheres ( $\Delta T_m^{\text{app}} = +1^\circ\text{C}$  cutoff), and larger spheres in case of positions in *PjTA* that show above average deviation from consensus (positive ConSurf score). **B**) distribution of highly conserved positions and regions along the sequence. Colors: light brown, ConSurf score of all positions; brown, ConSurf score averaged over a 5 amino acid sliding window; purple, interface residues; green marks, residues contacting the PLP cofactor; red dots, stabilizing mutations ( $\Delta T_m^{\text{app}}$  plotted,  $^\circ\text{C}$ ); blue lines, deviation from consensus (arbitrary units proportional to ConSurf score). The positions of Ile154 and the internal aldimine Lys287 are also marked.

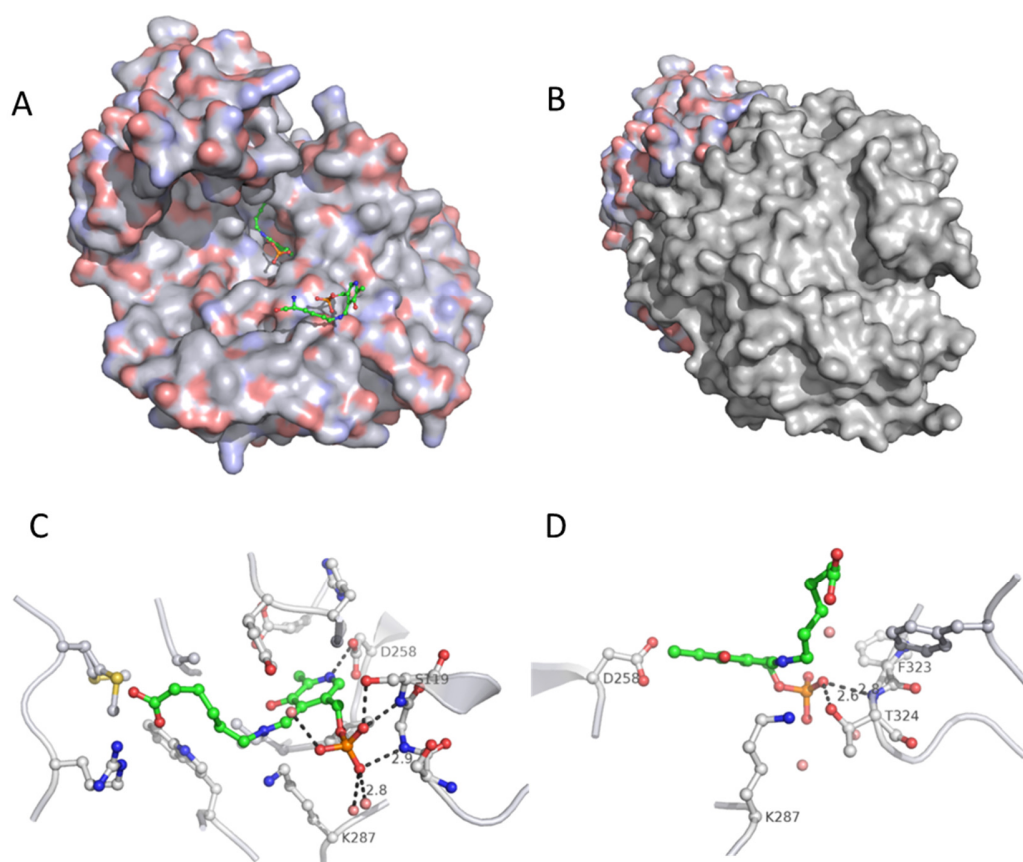

**Figure S6.** Intersubunit binding of PLP cofactors in *PjTA*. **A)** position of the PLP cofactors (external aldimine with 6-aminohexanoic acid, green) at the protein surface of the *PjTA* A monomer. **B)** The PLP binding sites covered by the B monomer (grey). **C)** Hydrogen bonding interactions between the PLP phosphate group and residues of the A subunit; **D)** Interactions between the PLP phosphate group and residues of the B subunit. Distances in Å.

## References

- (1) Floor, R. J.; Wijma, H. J.; Colpa, D. I.; Ramos-Silva, A.; Jekel, P. A.; Szymański, W.; Feringa, B. L.; Marrink, S. J.; Janssen, D. B. Computational Library Design for Increasing Haloalkane Dehalogenase Stability. *ChemBioChem* **2014**, *15*, 1660-1672.
- (2) Arabnejad, H.; Dal Lago, M.; Jekel, P. A.; Floor, R. J.; Thunnissen, A. M. W. H.; Terwisscha van Scheltinga, A. C.; Wijma, H. J.; Janssen, D. B. A Robust Cosolvent-Compatible Haloalcohol Dehalogenase by Computational Library Design. *Protein Eng Des Sel.* **2017**, *30*, 173-187.
- (3) Martin, C.; Ovalle Maqueo, A.; Wijma, H.J.; Fraaije, M.W. Creating a More Robust 5-Hydroxymethylfurfural Oxidase by Combining Computational Predictions with a Novel Effective Library Design. *Biotechnol Biofuels.* **2018**, *11*, 56.

- (4) Wijma, H. J.; Floor, R. J.; Jekel, P. A.; Baker, D.; Marrink, S. J.; Janssen, D. B. Computationally Designed Libraries for Rapid Enzyme Stabilization. *Protein Eng Des Sel.* **2014**, *27*, 49-58.
- (5) Wu, B.; Wijma, H. J.; Song, L.; Rozeboom, H. J.; Poloni, C.; Tian, Y.; Arif, M. I.; Nuijens, T.; Quaedflieg, P. J. L. M.; Szymanski, W.; Feringa, B. L.; Janssen, D. B. Versatile Peptide C-Terminal Functionalization via a Computationally Engineered Peptide Amidase. *ACS Catal.* **2016**, *6*, 5405–5414.
- (6) Bu, Y.; Cui, Y.; Peng, Y.; Hu, M.; Tian, Y.; Tao, Y.; Wu, B. Engineering Improved Thermostability of the GH11 Xylanase from *Neocallimastix patriciarum* via Computational Library Design. *Appl Microbiol Biotechnol.* **2018**, *102*, 3675-3685.
- (7) Fürst, M.J.L.J.; Boonstra, M.; Bandstra, S.; Fraaije, M.W. Stabilization of Cyclohexanone Monooxygenase by Computational and Experimental Library Design. *Biotechnol Bioeng.* **2019**, *116*, 2167-2177.
- (8) Waterhouse, A.M.; Procter, J.B.; Martin, D.M.A.; Clamp, M.; Barton, G.J. Jalview Version 2 - A Multiple Sequence Alignment Editor and Analysis Workbench. *Bioinformatics* **2009**, *25*, 1189-1191.
- (9) Ashkenazy, H.; Abadi, S.; Martz, E.; Chay, O.; Mayrose, I.; Pupko, T.; Ben-Tal, N. ConSurf 2016: an Improved Methodology to Estimate and Visualize Evolutionary Conservation in Macromolecules. *Nucleic Acids Res.* **2016**, *44*, 344-350.
